# Supplementary figures and images for: Workload-dependent queuing model of an AQM-controlled wireless router with TCP traffic and its application to PER-based link adaptation
Source: Springer Nature journal article supplement (doi:10.1186/1687-1499-2014-67), 2014-04-27

$N = 1$ 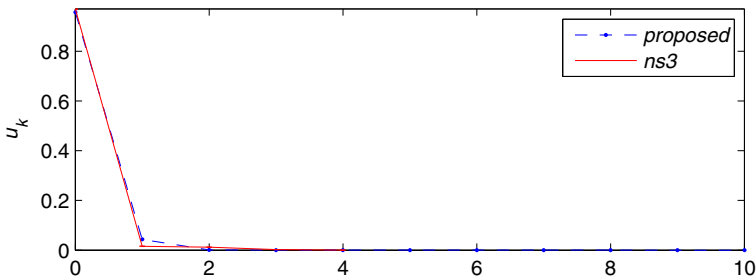 $N = 4$ 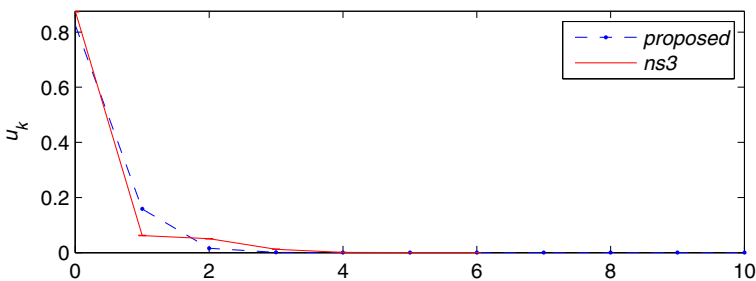 $N = 16$ 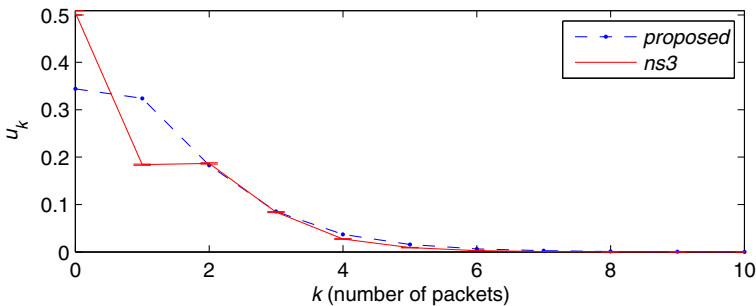

Supplement: 13638_2013_898_MOESM5_ESM.pdf [file 13638_2013_898_MOESM5_ESM.pdf]
